# Supplementary material for: Chemically fluorinated graphene oxide for room temperature ammonia detection at ppb levels
Source: Royal Society of Chemistry journal article supplement (doi:10.1039/c7ta05766k), 2017-01-01
Supplement: c7ta05766k1.pdf [file c7ta05766k1.pdf]

## Supporting Information

### Chemically Fluorinated Graphene Oxide for Room Temperature Ammonia Detection Capability at ppb Levels

Yeon Hoo Kim,<sup>a</sup> Ji Soo Park,<sup>a</sup> You-Rim Choi,<sup>a</sup> Seo Yun Park,<sup>a</sup> Seon Yong Lee,<sup>a</sup> Woonbae Sohn,<sup>a</sup>  
Young-Seok Shim,<sup>b</sup> Jong-Heun Lee,<sup>c</sup> Chong Rae Park,<sup>a</sup> Yong Seok Choi,<sup>d</sup> Byung Hee Hong,<sup>d</sup> Jung Hun  
Lee,<sup>a</sup> Wi Hyong Lee,<sup>e</sup> Donghwa Lee,<sup>\*,f</sup> and Ho Won Jang<sup>\*,a</sup>

a. Department of Materials Science and Engineering, Research Institute for Advanced Materials, Seoul National University,  
Seoul 08826, Republic of Korea

b. Center for Electronic Materials, Korea Institutes of Science and Technology (KIST), Seoul 02791, Republic of Korea

c. Department of Materials Science and Engineering, Korea University, Seoul 02841, Republic of Korea

d. Department of Chemistry, Seoul National University, Seoul 08826, Republic of Korea

e. Department of Organic and Nano System Engineering, Konkuk University, Seoul 05029, Republic of Korea

f. Department of Materials Science and Engineering, Pohang University of Science and Technology, Pohang, Gyeongbuk,  
37673, Republic of Korea

\*Corresponding authors: hwjang@snu.ac.kr, donghwa96@postech.ac.kr

**Table S1.** The content of fluorine and ratio of C/F in this work and the previous works.

| <b>Synthetic method</b>     | <b>Fluorine content (atomic %)</b>   | <b>C/F ratio</b>          | <b>Reference</b> |
|-----------------------------|--------------------------------------|---------------------------|------------------|
| Facile solution process     | 25.21 (Carbon: 60.10, Oxygen: 14.69) | C <sub>2.38</sub> F       | This work        |
| Plasma treatment            | 24.6                                 | C <sub>3.1</sub> F        | 1                |
| Hydrothermal method         | -                                    | C <sub>2.1</sub> F        | 2                |
| Gas exposure                | 4.94 – 34.36                         | C <sub>11.49-1.56</sub> F | 3                |
| Improved hummer's method    | 23.00                                | C <sub>2.81</sub> F       | 4                |
| Annealing with gas exposure | 33.41 – 48.11                        | C <sub>1.65-0.98</sub> F  | 5                |

**Table S2.** The content of carbon and oxygen in CFGO, rGO and GO.

| <b>Product</b> | <b>Carbon and oxygen content (atomic %)</b>    | <b>C/O ratio</b> |
|----------------|------------------------------------------------|------------------|
| CFGO           | Carbon: 60.10, Oxygen: 14.69 (Fluorine: 25.21) | $C_{4.09}O$      |
| rGO            | Carbon: 86.86, Oxygen: 13.14                   | $C_{6.61}O$      |
| GO             | Carbon: 70.33, Oxygen: 29.67                   | $C_{2.37}O$      |

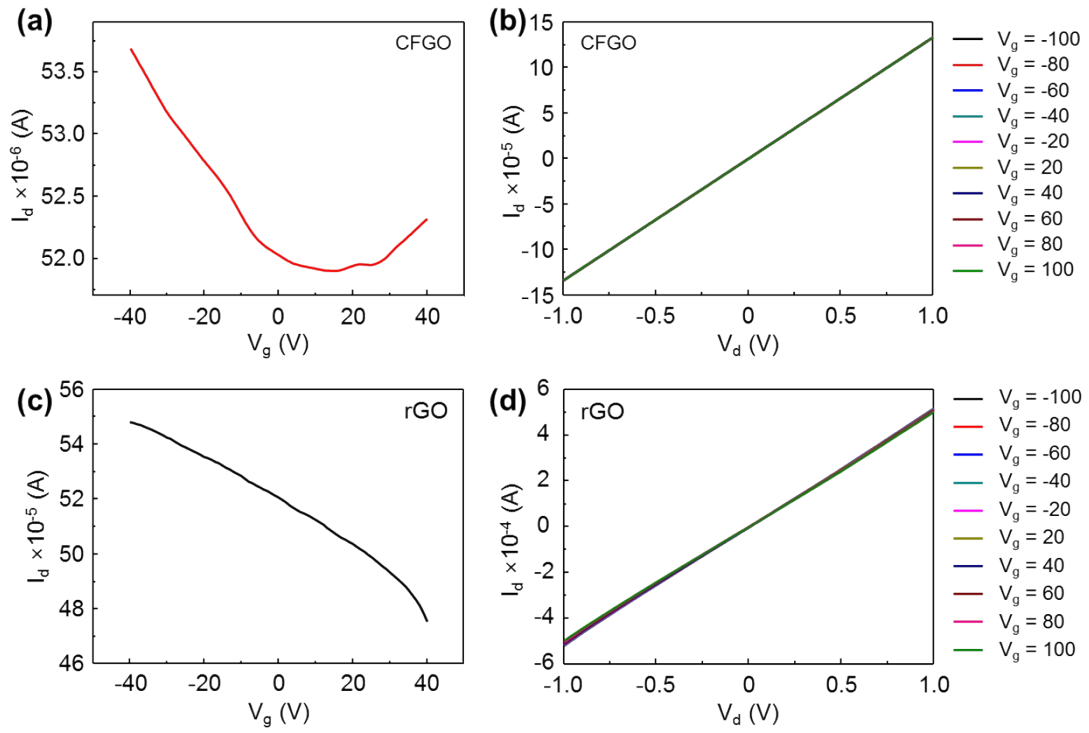

**Fig. S1** Transfer and output characteristics of (a-b) CFGO and (c-d) rGO FETs.

### FET characterization

The channel length and width of the fabricated FETs were 100 and 2000  $\mu\text{m}$ , respectively. Current-voltage characteristics of all devices were measured using a Keithley 4200-SCS and a probe station operated under air condition. After deposition of source and drain electrodes, each device was isolated by a mechanical scratch. In order to collect transfer characteristics, the gate voltage was swept from  $V_g = 40$  V to  $V_g = -40$  V in increments of  $-1$  V, while the source-drain voltage was kept unchanged at  $V_d = -0.1$  and 1 V for CFGO and rGO devices, respectively.

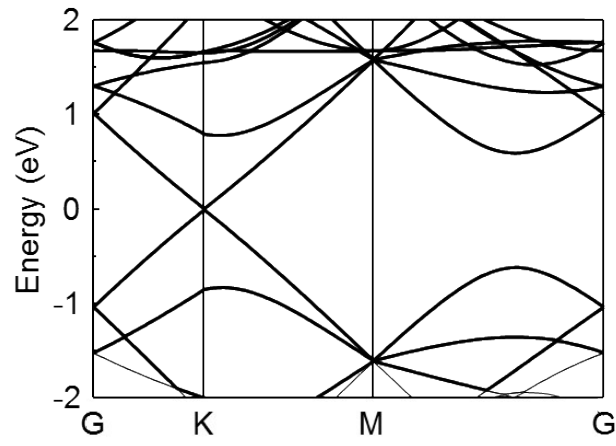

**Fig. S2** Electronic band structure of graphene.

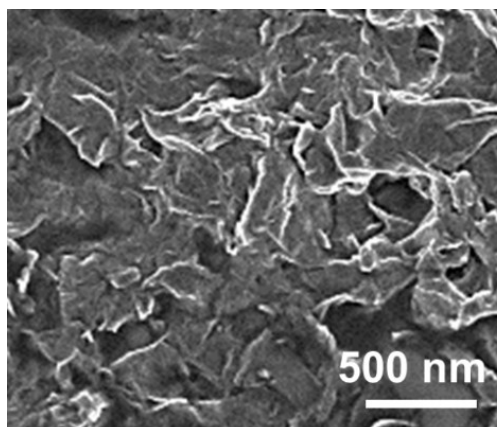

**Fig. S3** SEM image of a rGO film.

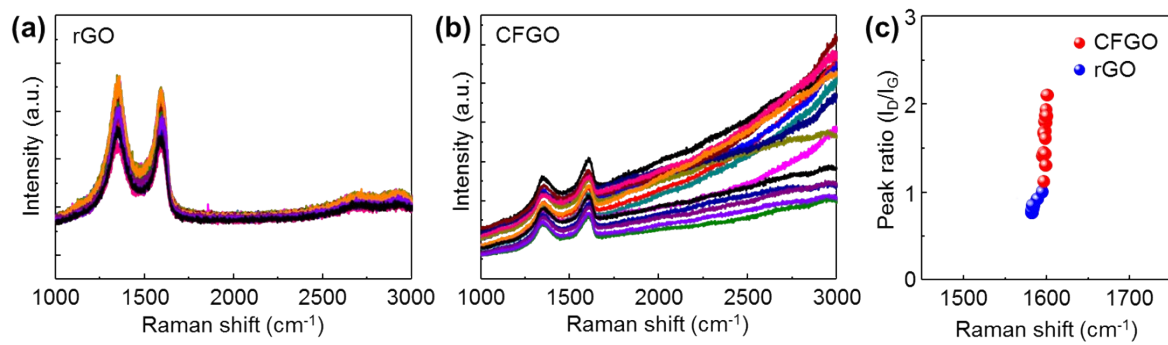

**Fig. S4** Raman spectra of (a) rGO and (b) CFGO films for fifteen different spots on SiO<sub>2</sub> substrates. (c) Intensity ratio  $I_D/I_G$  of CFGO (red) and rGO (blue) film.

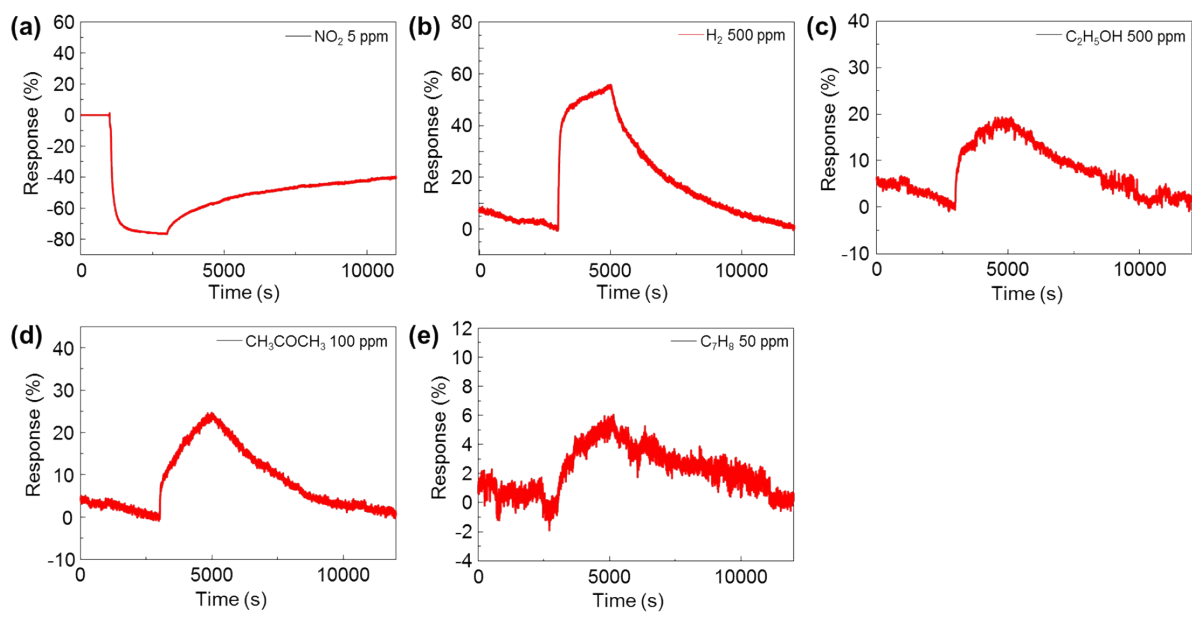

**Fig. S5** Response curves of the CFGO sensor to (a) 5ppm NO<sub>2</sub>, (b) 500 ppm H<sub>2</sub>, 500 ppm C<sub>2</sub>H<sub>5</sub>OH, 100 ppm CH<sub>3</sub>COCH<sub>3</sub> and 50 ppm C<sub>7</sub>H<sub>8</sub>.



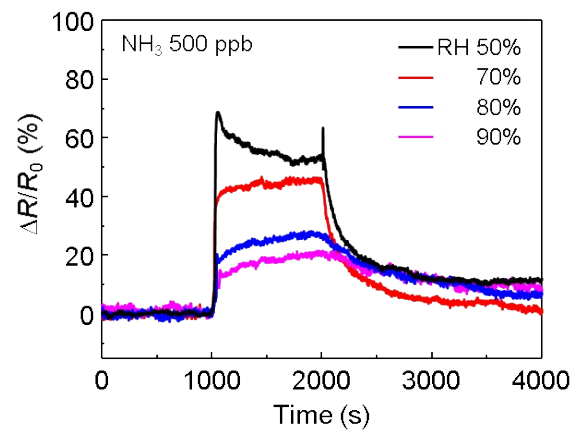

**Fig. S6** Response curves of the CFGO sensor to NH<sub>3</sub> 500 ppb in 50 to 90 % of relative humidity (RH) atmosphere.

## References

1. H. Zhang, L. Fan, H. Dong, P. Zhang, K. Nie, J. Zhong, Y. Li, J. Guo and X. Sun, *ACS Appl. Mater. Interfaces* **2016**, 8, 8652.
2. Z. Wang, J. Wang, Z. Li, P. Gong, X. Liu, L. Zhang, J. Ren, H. Wang and S. Yang, Synthesis of Fluorinated Graphene with Tunable Degree of Fluorination. *Carbon* **2012**, 50, 5403.
3. M.-S. Park, K. H. Kim, M.-J. Kim and Y.-S. Lee, NH<sub>3</sub> Gas Sensing Properties of A Gas Sensor Based on Fluorinated Graphene Oxide. *Colloids. Surf. A Physicochem. Eng. Asp.* **2016**, 490, 104.
4. A. Mathkar, T. Narayanan, L. B. Alemany, P. Cox, P. Nguyen, G. Gao, P. Chang, R. Romero-Aburto, S. A. Mani and P. M. Ajayan, Synthesis of Fluorinated Graphene Oxide and Its Amphiphobic Properties. *Part. Part. Syst. Char.* **2013**, 30, 266.
5. X. Wang, Y. Dai, J. Gao, J. Huang, B. Li, C. Fan, J. Yang and X. Liu, High-Yield Production of Highly Fluorinated Graphene by Direct Heating Fluorination of Graphene-Oxide. *ACS Appl. Mater. Interfaces.* **2013**, 5, 8294.
